# Supplementary figures and images for: RNAi-Mediated Manipulation of Cuticle Coloration Genes in Lygus hesperus Knight (Hemiptera: Miridae)
Source: MDPI journal article supplement (doi:10.3390/insects13110986), 2022-10-27

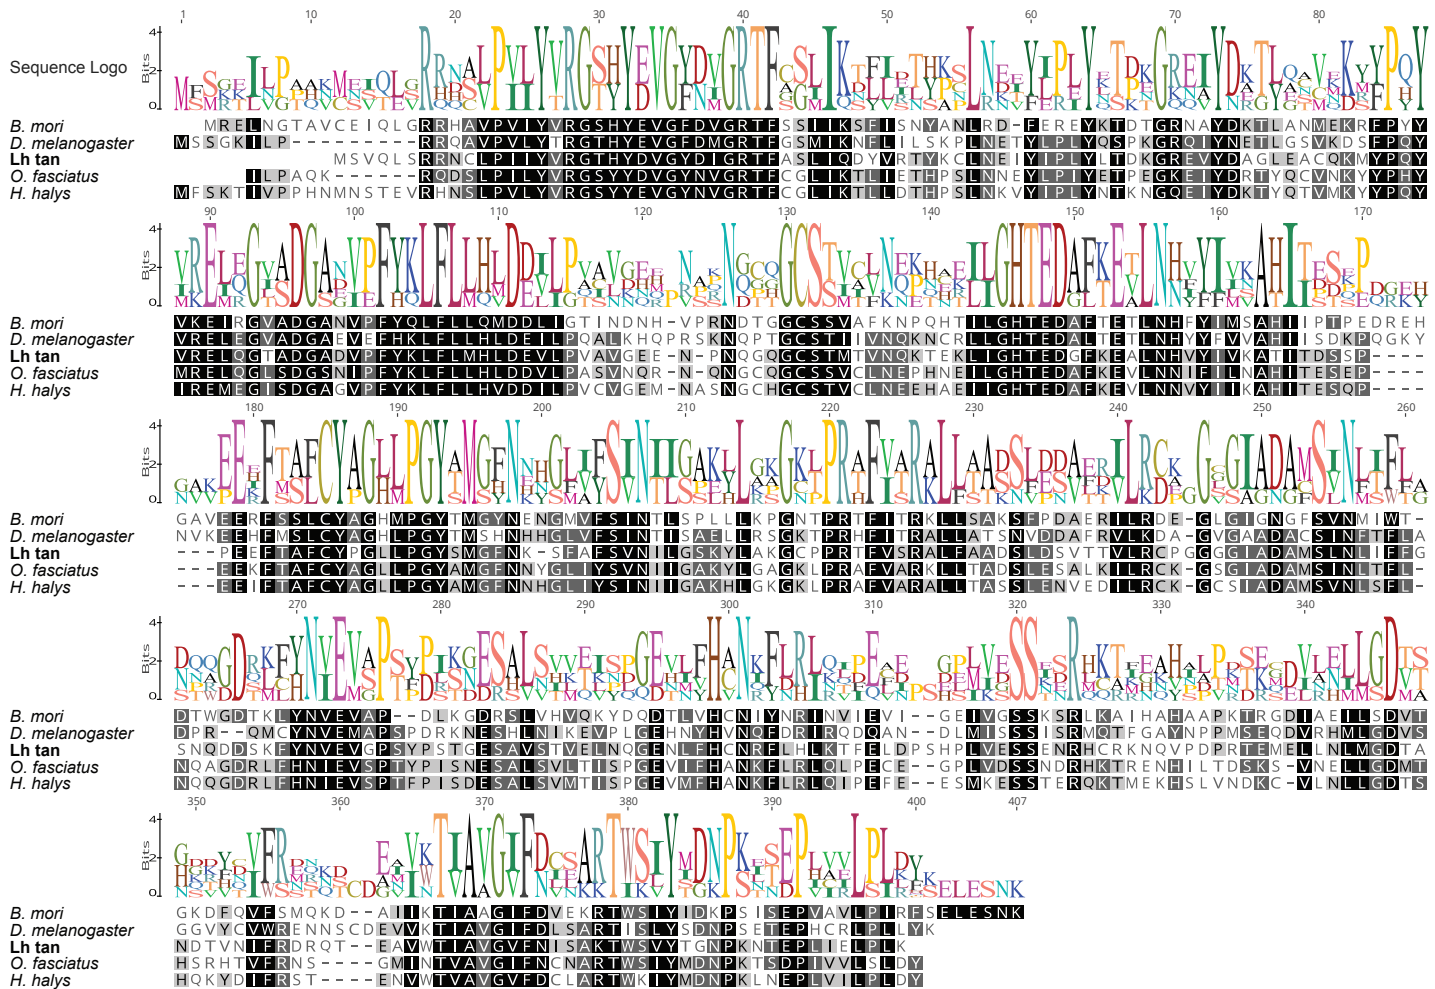

Supplement: s1 [file s1]

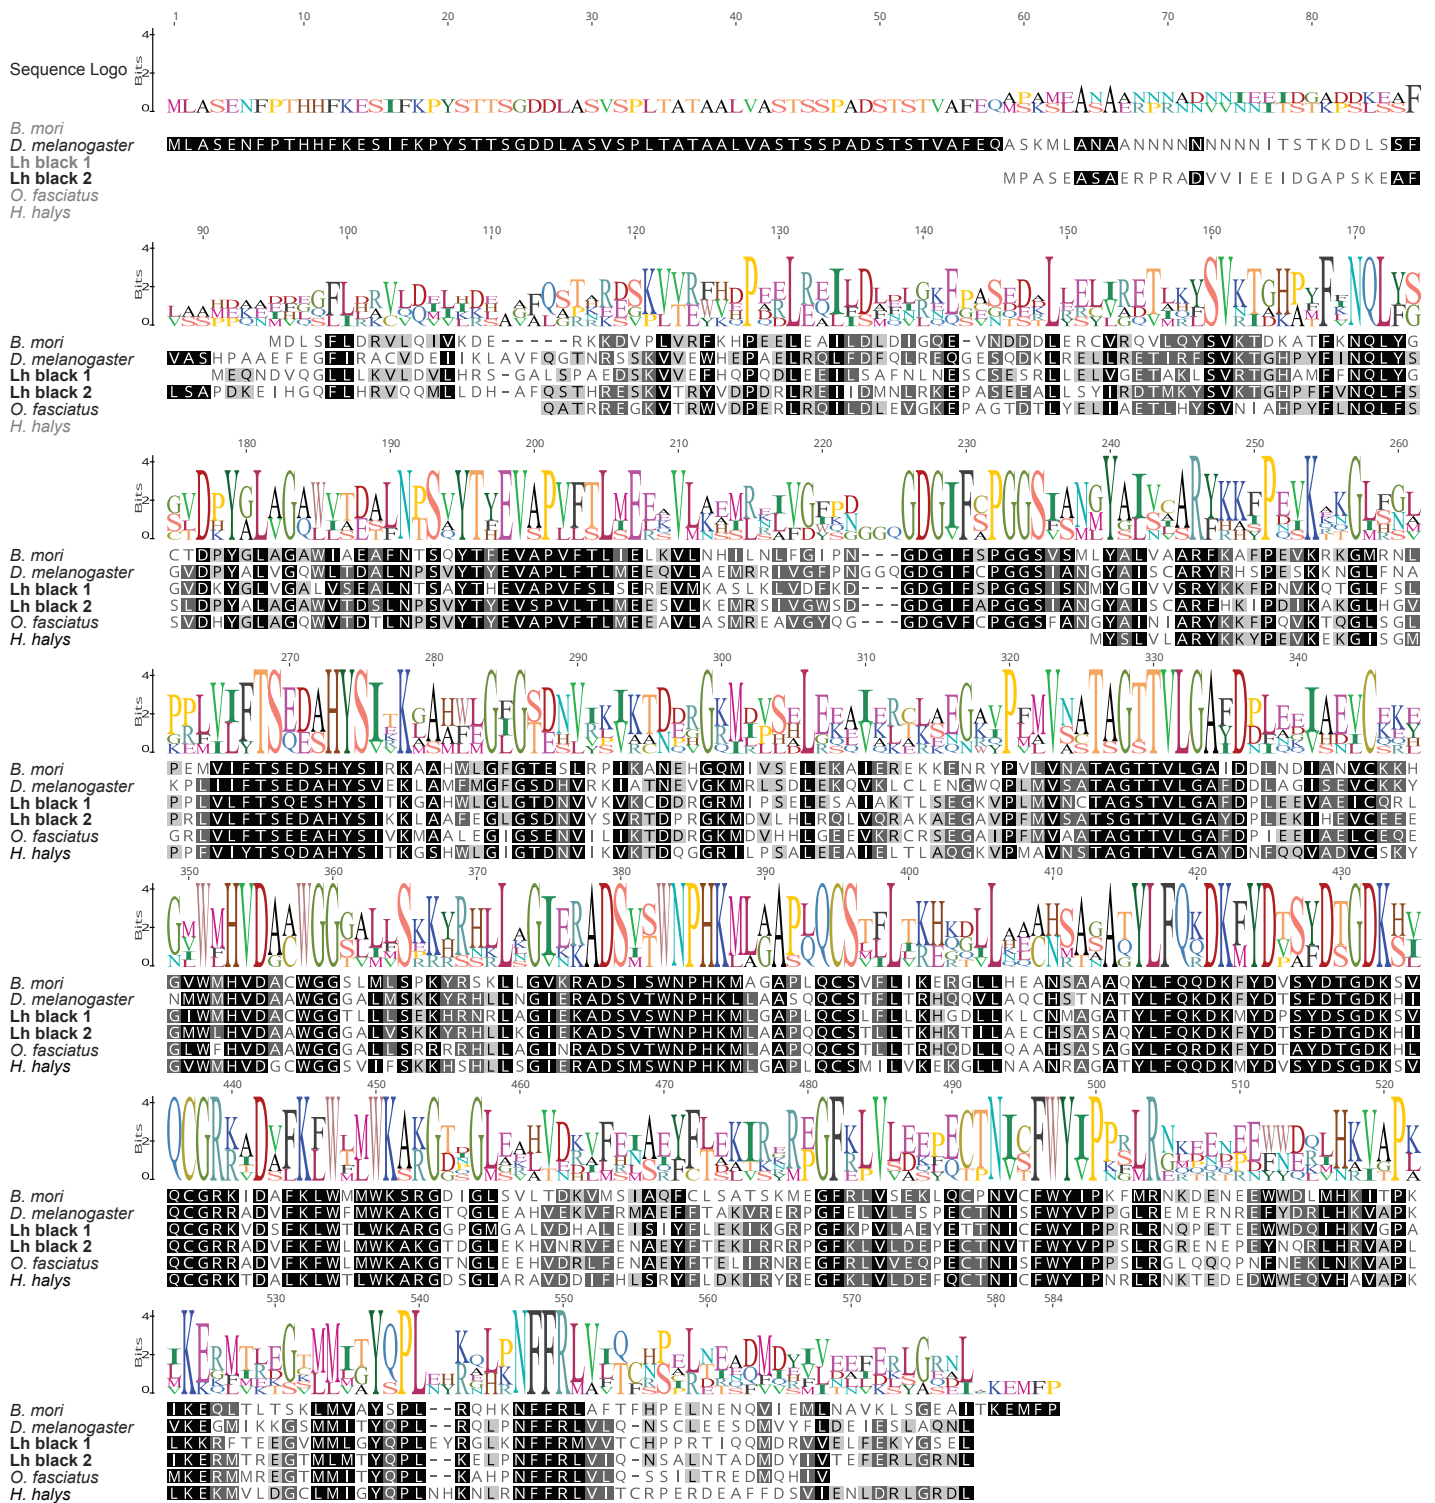

Supplement: s1 [file s1]

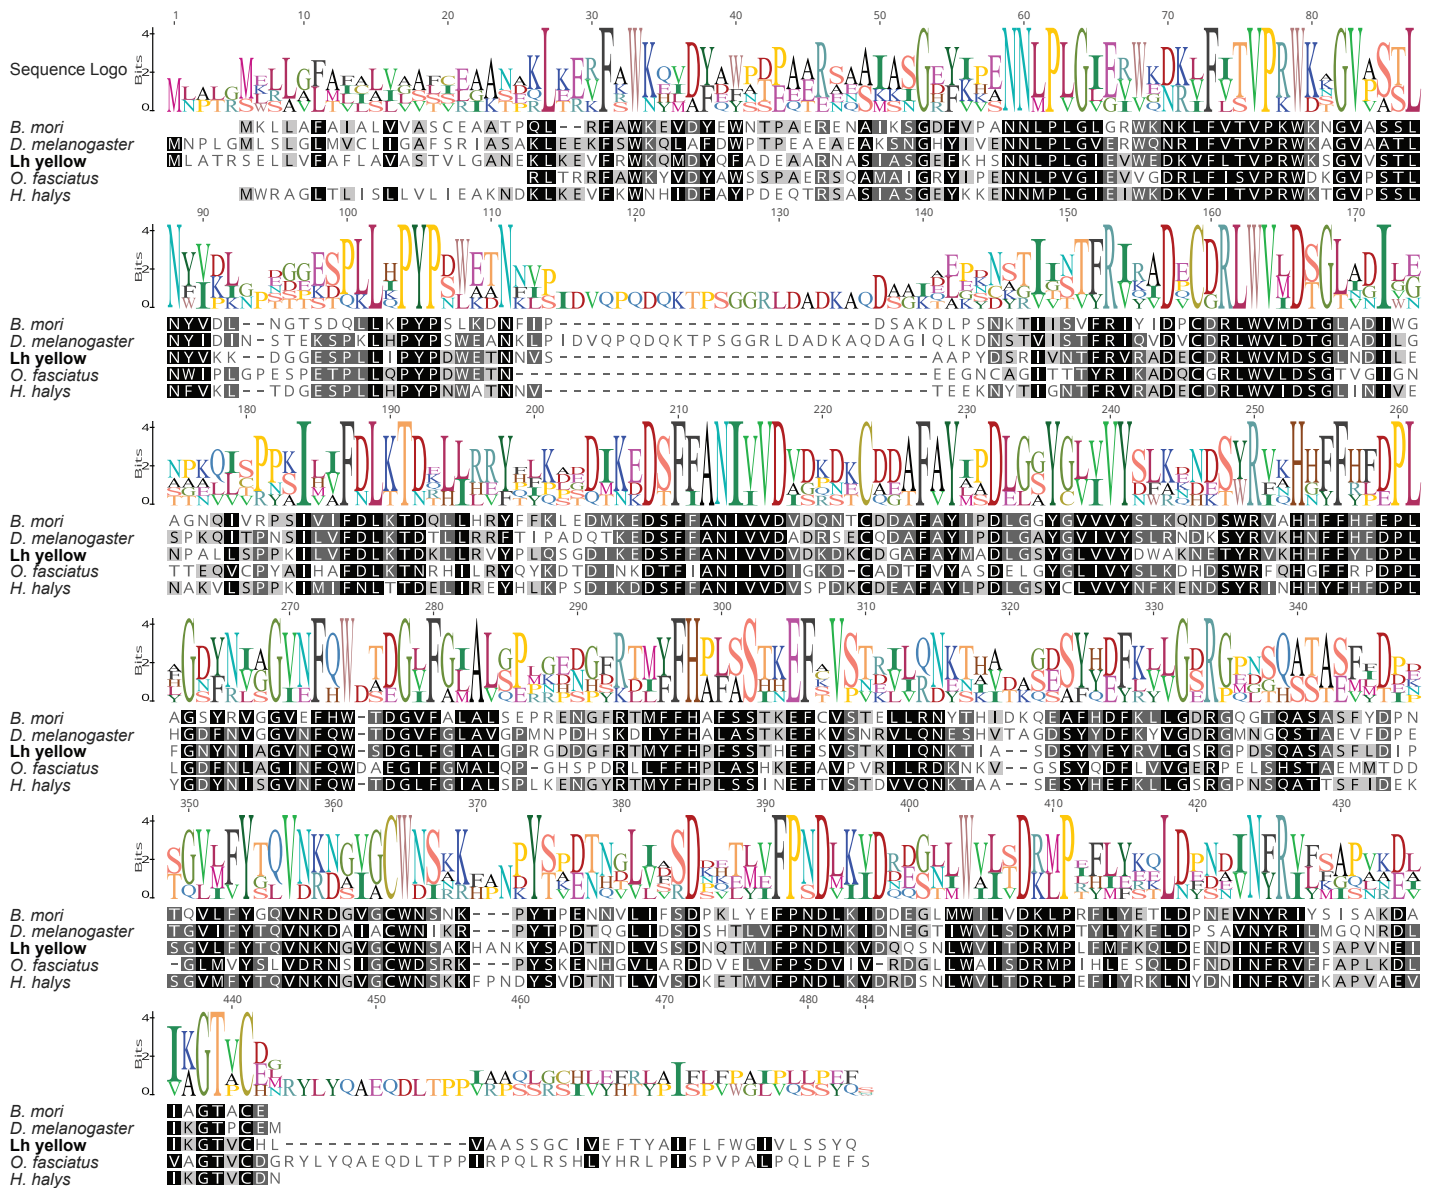

Supplement: s1 [file s1]

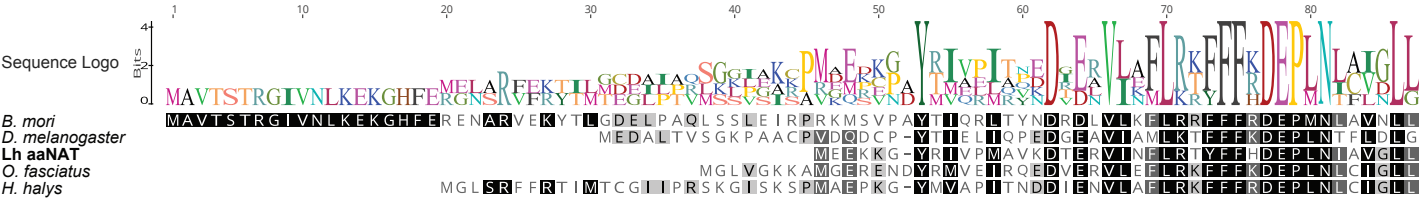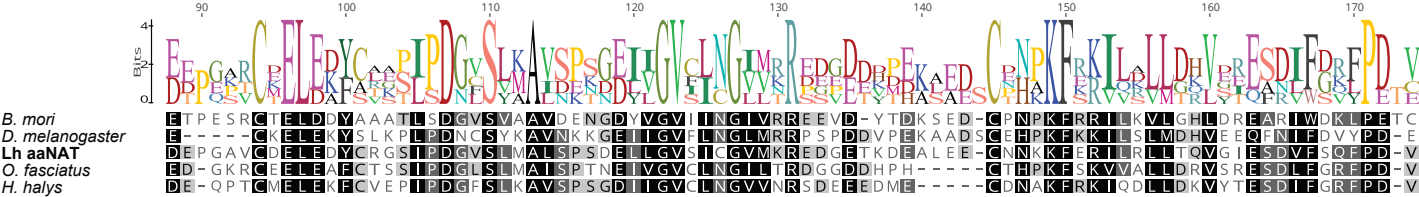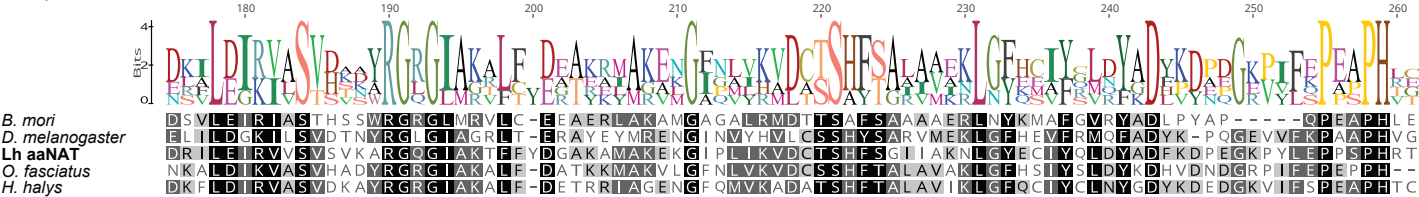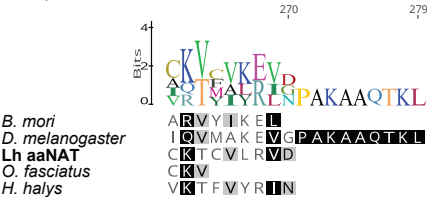

Supplement: s1 [file s1]

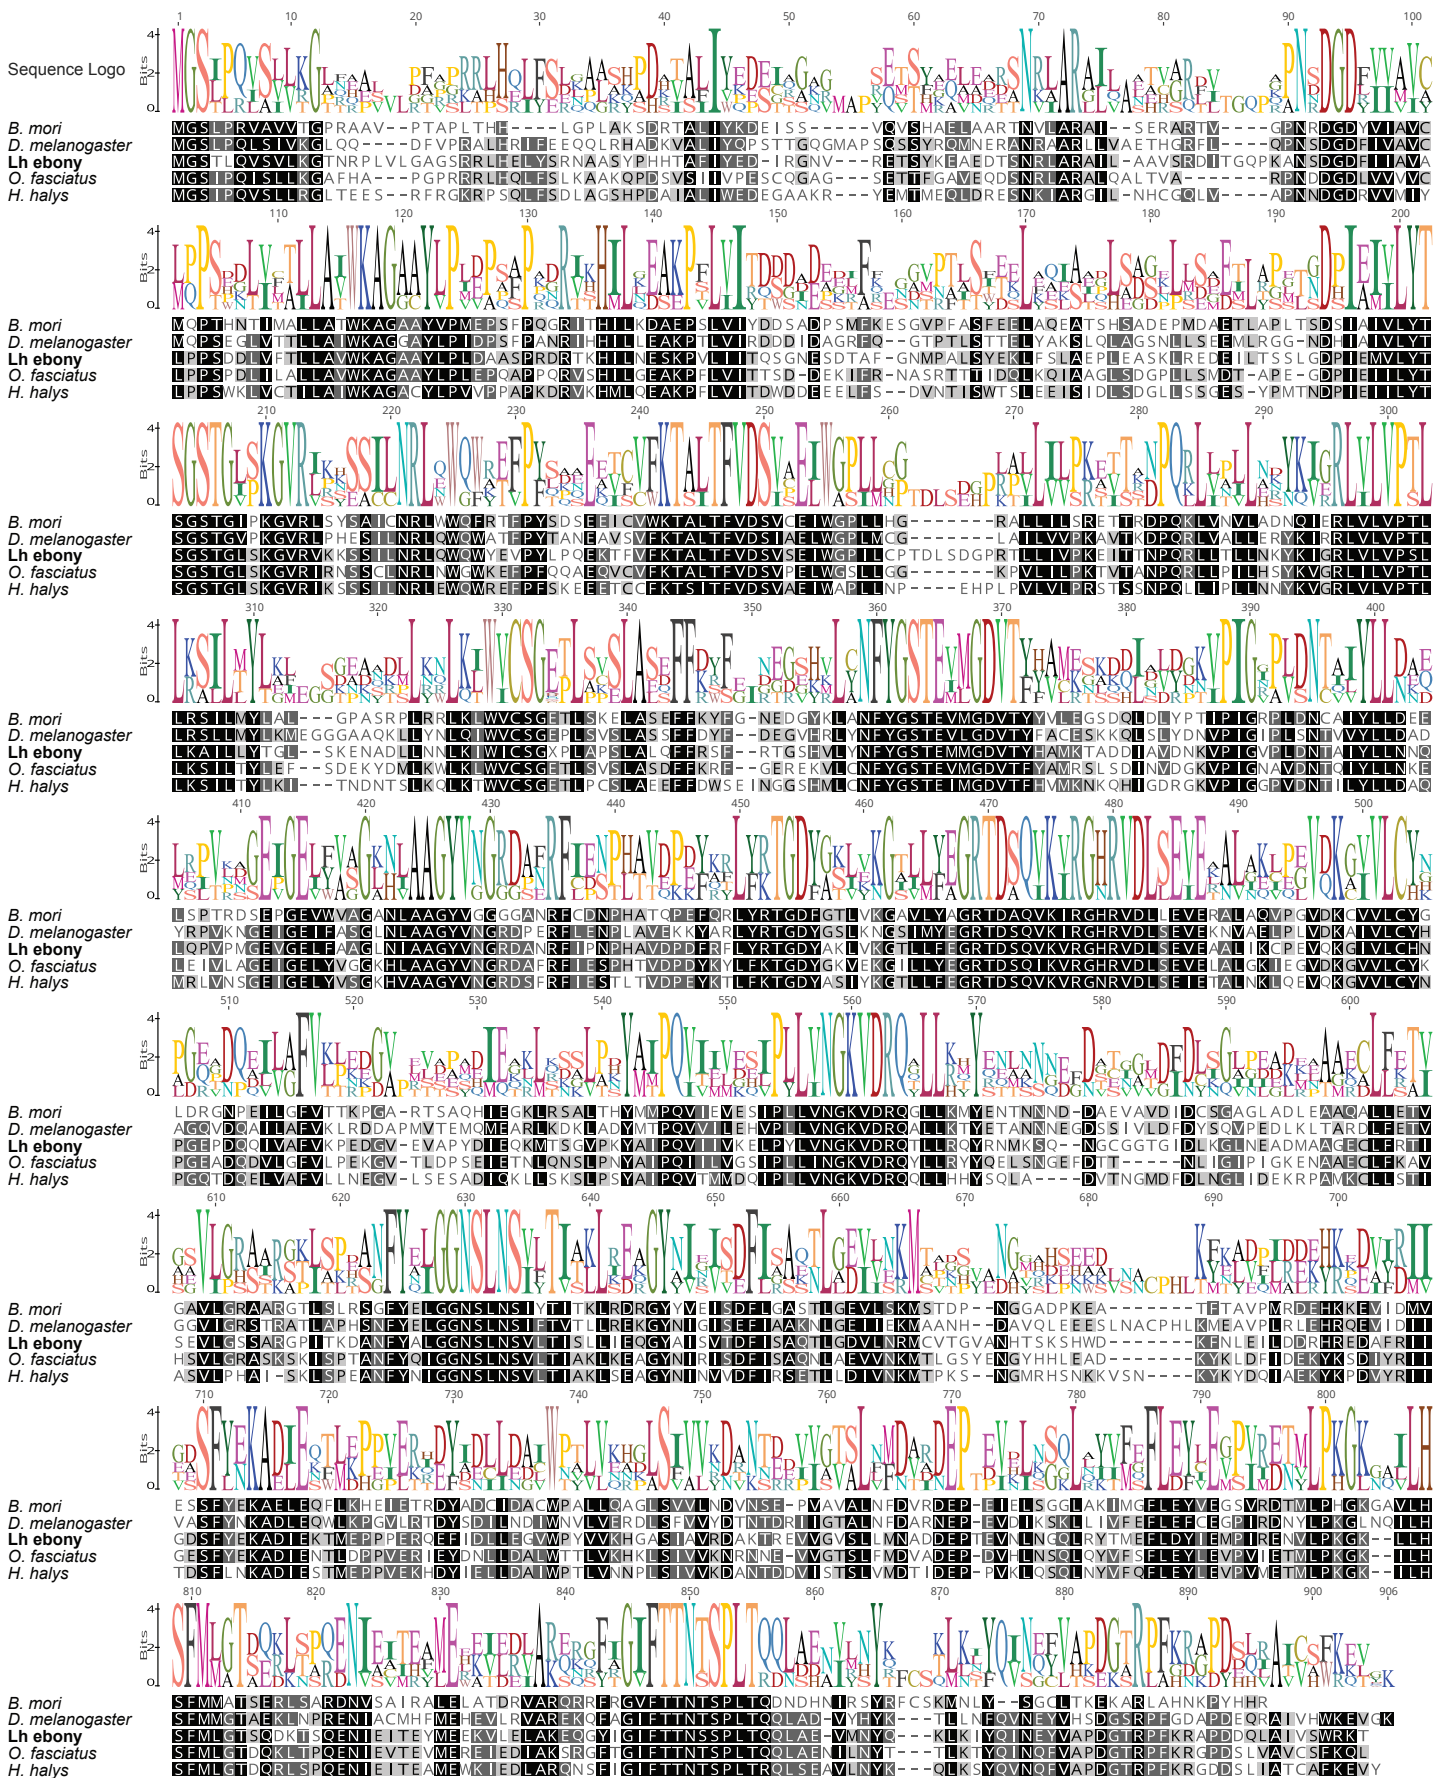

Supplement: s1 [file s1]

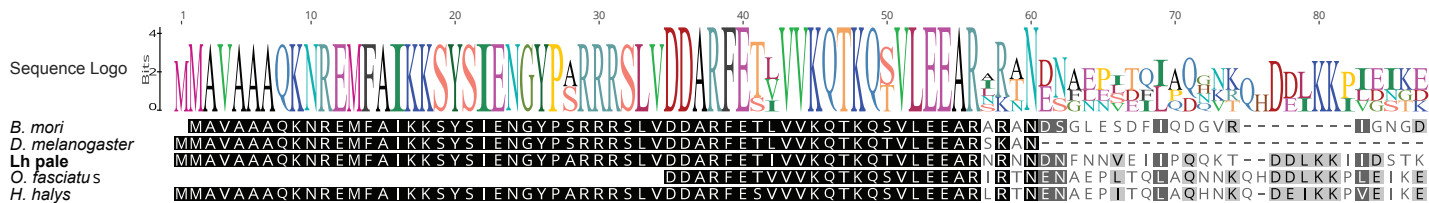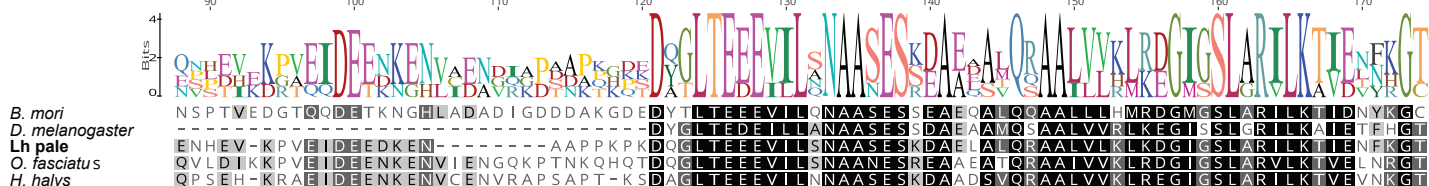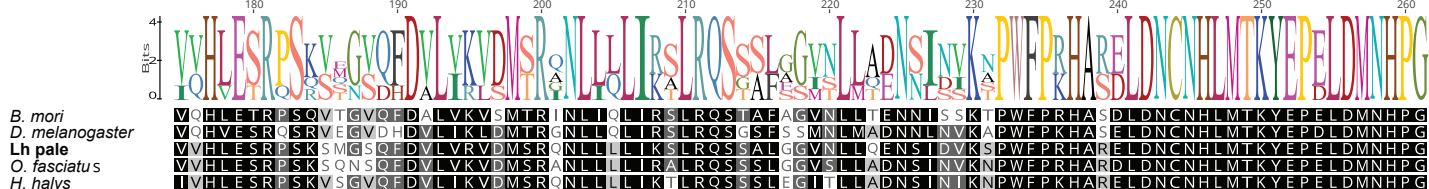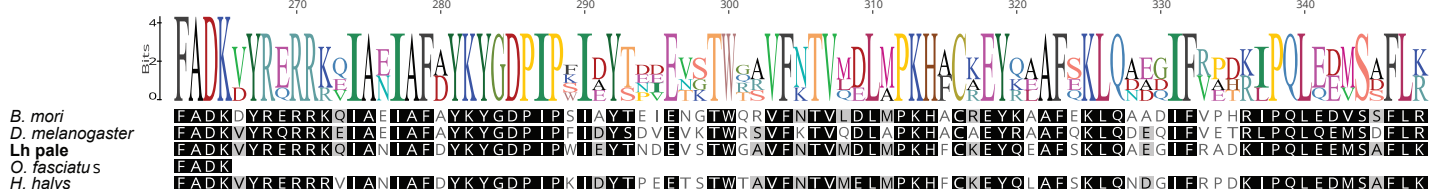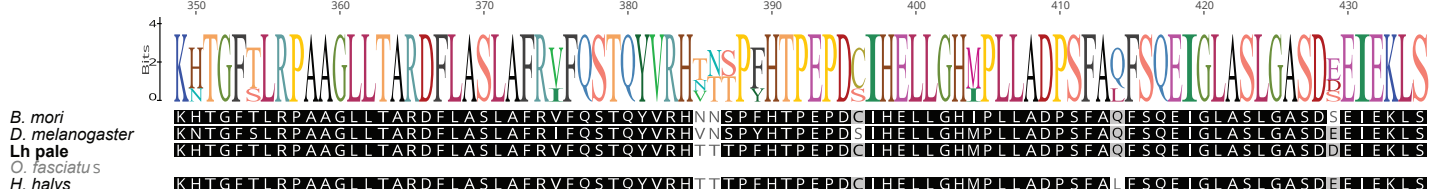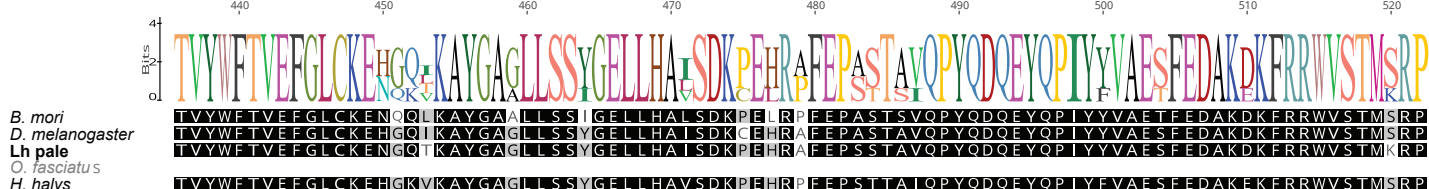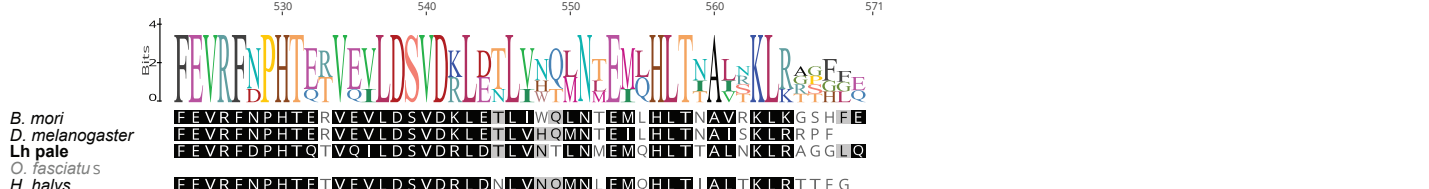

Supplement: s1 [file s1]

- Coleoptera
- Diptera
- Hemiptera
- Hymenoptera
- Lepidoptera

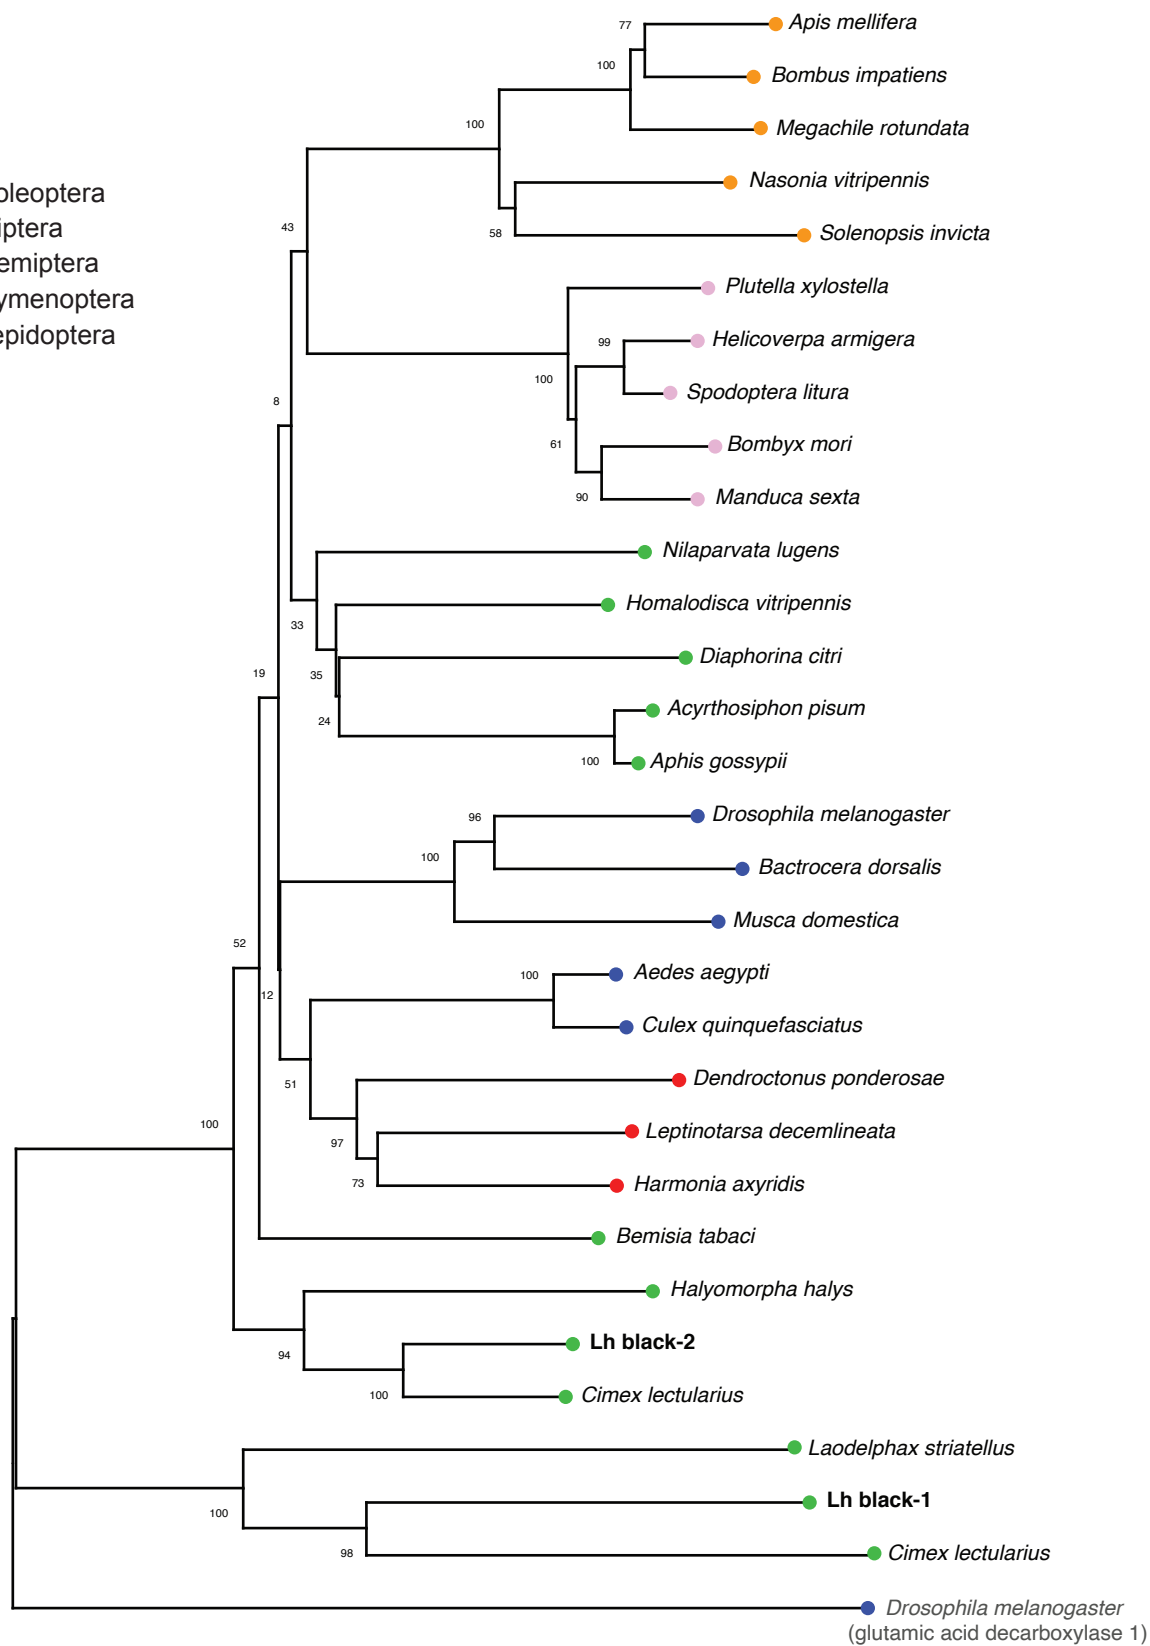

Supplement: s1 [file s1]
